# Supplementary material for: CanCOG®: Cultural Adaptation of the Evidence-Based UCLA Cognitive Rehabilitation Intervention Program for Cancer Survivors in Portugal
Source: MDPI journal article supplement (doi:10.3390/healthcare11010141), 2023-01-02
Supplement: s1 [file s1]

**Table S3.** Group characteristics of the UCLA program participants (US) and potential participants from Portugal.

| UCLA program participants – US                      |                                                                             | Cultural adaptation group – Portugal                                                       | Potential mismatch                                                                                                                                                  |
|-----------------------------------------------------|-----------------------------------------------------------------------------|--------------------------------------------------------------------------------------------|---------------------------------------------------------------------------------------------------------------------------------------------------------------------|
| Characteristics                                     |                                                                             |                                                                                            |                                                                                                                                                                     |
| Target population                                   | Female breast cancer survivors aged 21 to 75 years                          | Adult non-CNS cancer survivors                                                             | Type of cancer and treatment used                                                                                                                                   |
| Primary language                                    | English                                                                     | Portuguese                                                                                 | Language differences may impact understanding and access to intervention<br>Differences in life experiences, social norms, attitudes, beliefs, and cultural factors |
| Country of origin                                   | US                                                                          | Portugal                                                                                   |                                                                                                                                                                     |
| Setting                                             | Los Angeles (US) – Urban                                                    | Aveiro/Coimbra/Porto/other cities (Portugal) – Urban                                       |                                                                                                                                                                     |
| Sociodemographic characteristics of the populations |                                                                             |                                                                                            |                                                                                                                                                                     |
| Mean Age (years)                                    | 53.8                                                                        | 60.4 *                                                                                     | Sociodemographic differences, mainly related to age and education level, can influence the implementation and validation of the culturally adapted program          |
| Education level                                     | Less than college: 25%<br>College graduate: 21%<br>Post-college degree: 54% | Less than college: 68% *<br>College or post-college degree: 32% *                          |                                                                                                                                                                     |
| Staff                                               |                                                                             |                                                                                            |                                                                                                                                                                     |
| Type of staff                                       | Trained staff, English-speaking                                             | Trained staff, Portuguese-speaking                                                         | n/a                                                                                                                                                                 |
| Community engagement                                |                                                                             |                                                                                            |                                                                                                                                                                     |
| Community consultation                              | Consultation with experts in program design and delivery                    | Consultation with experts and the target population during the cultural adaptation process | n/a                                                                                                                                                                 |

\* Based on Torres, A., Pereira, A., & Monteiro, S. (2012). Cognitive-Behavioral Group Therapy for Breast Cancer Survivors: Description of a Program and Preliminary Evaluation of its Effectiveness. *Psychology, Community & Health*, 1(3), 300–312. <https://doi.org/10.5964/pch.v1i3.55>
