# Supplementary material for: CanCOG®: Cultural Adaptation of the Evidence-Based UCLA Cognitive Rehabilitation Intervention Program for Cancer Survivors in Portugal
Source: MDPI journal article supplement (doi:10.3390/healthcare11010141), 2023-01-02
Supplement: s1 [file s1]

**Table S2.** COREQ (COnsolidated criteria for REporting Qualitative research) Checklist.

| Topic                                          | Item No. | Guide Questions/ Description                                                                                                               | Reported on Page No. | Explanation                                                                                                                            |
|------------------------------------------------|----------|--------------------------------------------------------------------------------------------------------------------------------------------|----------------------|----------------------------------------------------------------------------------------------------------------------------------------|
| <b>Domain 1: Research team and reflexivity</b> |          |                                                                                                                                            |                      |                                                                                                                                        |
| <b>Personal characteristics</b>                |          |                                                                                                                                            |                      |                                                                                                                                        |
| Interviewer/facilitator                        | 1        | Which author/s conducted the interview or focus group?                                                                                     | 12                   | A.F.O. and A.B. conducted the interviews.                                                                                              |
| Credentials                                    | 2        | What were the researcher's credentials? E.g., PhD, MD                                                                                      | NR                   | A.F.O. MSc in Health Psychology and Neuropsychological Rehabilitation.<br>A.B. PhD in Psychology.                                      |
| Occupation                                     | 3        | What was their occupation at the time of the study?                                                                                        | NR                   | A.F.O. employed as a PhD candidate.<br>A.B. employed as an assistant professor.                                                        |
| Gender                                         | 4        | Was the researcher male or female?                                                                                                         | NR                   | A.F.O. and A.B. females.                                                                                                               |
| Experience and training                        | 5        | What experience or training did the researcher have?                                                                                       | 12                   | Focus groups were conducted by psychologists with experience in qualitative research.                                                  |
| <b>Relationship with participants</b>          |          |                                                                                                                                            |                      |                                                                                                                                        |
| Relationship established                       | 6        | Was a relationship established prior to study commencement?                                                                                | 11                   | Some participants had previous contact with the interviewers before starting the study.                                                |
| Participant knowledge of the interviewer       | 7        | What did the participants know about the researcher? e.g., personal goals, reasons for doing the research?                                 | NR                   | Participants knew that the leading researcher was a psychologist undertaking a PhD program.                                            |
| Interviewer characteristics                    | 8        | What characteristics were reported about the interviewer/facilitator? e.g., Bias, assumptions, reasons and interests in the research topic | NR                   | The interviewers had experience working and researching with cancer survivors, but none had personally experienced a cancer diagnosis. |

| Domain 2: Study design                |    |                                                                                                                                                           |        |                                                                                                                         |
|---------------------------------------|----|-----------------------------------------------------------------------------------------------------------------------------------------------------------|--------|-------------------------------------------------------------------------------------------------------------------------|
| Theoretical framework                 |    |                                                                                                                                                           |        |                                                                                                                         |
| Methodological orientation and theory | 9  | What methodological orientation was stated to underpin the study? e.g., grounded theory, discourse analysis, ethnography, phenomenology, content analysis | 10, 12 | A qualitative design was followed; namely, a focus group with thematic analysis to explore the program's acceptability. |
| Participant selection                 |    |                                                                                                                                                           |        |                                                                                                                         |
| Sampling                              | 10 | How were participants selected? e.g., purposive, convenience, consecutive, snowball                                                                       | 11     | Recruitment was carried out using a snowball procedure.                                                                 |
| Method of approach                    | 11 | How were participants approached? e.g., face-to-face, telephone, mail, email                                                                              | 11     | Participants were approached by e-mail.                                                                                 |
| Sample size                           | 12 | How many participants were in the study?                                                                                                                  | 10     | Eleven cancer survivors participated in this study.                                                                     |
| Non-participation                     | 13 | How many people refused to participate or dropped out? Reasons?                                                                                           | 10     | All contacted cancer survivors voluntarily agreed to participate.                                                       |
| Setting                               |    |                                                                                                                                                           |        |                                                                                                                         |
| Setting of data collection            | 14 | Where was the data collected? e.g., home, clinic, workplace                                                                                               | 10     | The focus groups were conducted online via Zoom.                                                                        |
| Presence of nonparticipants           | 15 | Was anyone else present besides the participants and researchers?                                                                                         | 10     | Only participants and researchers were present.                                                                         |
| Description of sample                 | 16 | What are the important characteristics of the sample? e.g., demographic data, date                                                                        | 21-22  | Details of the sample are included in section "3.3. Appraisal by the Target Population".                                |

| <b>Data collection</b>                 |    |                                                                               |                   |                                                                                              |
|----------------------------------------|----|-------------------------------------------------------------------------------|-------------------|----------------------------------------------------------------------------------------------|
| Interview guide                        | 17 | Were questions, prompts, guides provided by the authors? Was it pilot tested? | 11-12<br>Table S1 | The focus group agenda and semi-structured guide are reported in the text.                   |
| Repeat interviews                      | 18 | Were repeat interviews carried out? If yes, how many?                         | No                | Repeat interviews were not conducted.                                                        |
| Audio/visual recording                 | 19 | Did the research use audio or visual recording to collect the data?           | 12                | Focus group interviews were visual and audio-recorded.                                       |
| Field notes                            | 20 | Were field notes made during and/or after the interview or focus group?       | 12                | After the focus groups.                                                                      |
| Duration                               | 21 | What was the duration of the interviews or focus group?                       | 10                | The focus groups lasted, on average, 120 minutes.                                            |
| Data saturation                        | 22 | Was data saturation discussed?                                                | No                | Data saturation was not discussed.                                                           |
| Transcripts returned                   | 23 | Were transcripts returned to participants for comment and/or correction?      | No                | Transcripts were not returned to participants.                                               |
| <b>Domain 3: Analysis and findings</b> |    |                                                                               |                   |                                                                                              |
| <b>Data analysis</b>                   |    |                                                                               |                   |                                                                                              |
| Number of data coders                  | 24 | How many data coders coded the data?                                          | 12                | Thematic analysis was carried out independently by two of the researchers (A.F.O. and A.B.). |
| Description of the coding tree         | 25 | Did authors provide a description of the coding tree?                         | No                | No description of the coding tree is provided.                                               |
| Derivation of themes                   | 26 | Were themes identified in advance or derived from the data?                   | 11-12<br>Table S1 | The focus group guide script provided a framework for data analysis.                         |
| Software                               | 27 | What software, if applicable, was used to manage the data?                    | 12                | The software ATLAS.ti 22 was used.                                                           |
| Participant checking                   | 28 | Did participants provide feedback on the findings?                            | No                | Participants were not requested to give feedback on the findings.                            |

| <b>Reporting</b>             |    |                                                                                                                                       |       |                                                                                                                        |
|------------------------------|----|---------------------------------------------------------------------------------------------------------------------------------------|-------|------------------------------------------------------------------------------------------------------------------------|
| Quotations presented         | 29 | -Were participant quotations presented to illustrate the themes/findings?<br>-Was each quotation identified? e.g., participant number | 21-22 | Quotations are presented to illustrate the findings, along with the participants' sex and age, to preserve anonymity.  |
| Data and findings consistent | 30 | Was there consistency between the data presented and the findings?                                                                    | 21-22 | We aimed to clarify the data presented and the findings, supporting them with direct quotations from the participants. |
| Clarity of major themes      | 31 | Were major themes clearly presented in the findings?                                                                                  | 21-22 | Themes are clearly presented in the text.                                                                              |
| Clarity of minor themes      | 32 | Is there a description of diverse cases or discussion of minor themes?                                                                | No    | There is no description of diverse cases or minor themes.                                                              |
